# Supplementary material for: Holocentric Karyotype Evolution in Rhynchospora Is Marked by Intense Numerical, Structural, and Genome Size Changes
Source: PubMed Central journal article supplement (PMC7533669; doi:10.3389/fpls.2020.536507), 2020-09-10
Supplement: DataSheet_1.pdf [file DataSheet_1.pdf]

**SUPPLEMENTARY MATERIAL:** Burchardt et al. 2020. Holocentric karyotype evolution in *Rhynchospora* (Cyperaceae) is marked by intense numerical and structural changes, and in genome sizes.

**Supplemental data 1.** Genome and karyotype information of *Rhynchospora* species organized in sections according Kukenthal's classification

| Sections          | Species/Samples                                            | 2n | n     | x  | 2C ± SD (pg) | 1C (Mbp)    | Locality                      | References/new vouchers      |                               |
|-------------------|------------------------------------------------------------|----|-------|----|--------------|-------------|-------------------------------|------------------------------|-------------------------------|
| <i>Dichromena</i> | <i>R. wightiana</i> (Nees) Steudel                         | –  | 10    | 5  | –            | –           | –                             | Rath and Patnaik (1978)      |                               |
|                   | <i>R. albescens</i> (Miqu.) Kük.                           | –  | c. 10 | –  | –            | –           | –                             | Thomas (1984)                |                               |
|                   | <i>R. breviscula</i> H.Pfeiff.                             |    | 10    | 5  | 5            | –           | –                             | –                            | Luceño <i>et al.</i> (1998)   |
|                   |                                                            |    | 10    | 5  | 5            | –           | –                             | –                            | Arguelho <i>et al.</i> (2012) |
|                   |                                                            | 10 | 5     | 5  | 0.83 ± 0.02  | 405.87      | Guapiara, SP                  | FUEL056045                   |                               |
|                   |                                                            | 10 | 5     | 5  | 0.80 ± 0.02  | 391.20      | Eldorado, SP                  | FUEL056044                   |                               |
|                   |                                                            | 10 | 5     | 5  | 0.83 ± 0.03  | 405.87      | Iporanga, SP                  | FUEL055362                   |                               |
|                   | <i>R. colorata</i> (L.) Hitchc.                            | –  | 5     | 5  | –            | –           | –                             | Thomas (1984)                |                               |
|                   | <i>R. latifolia</i> (Baldw.) Thomas                        | –  | 5     | 5  | –            | –           | –                             | Thomas (1984)                |                               |
|                   | <i>R. nervosa</i> subsp. <i>nervosa</i><br>(Vahl) Böckeler |    | 10    | 5  | 5            | –           | –                             | –                            | Arguelho <i>et al.</i> (2012) |
|                   |                                                            |    | 10    | 5  | 5            | –           | –                             | Chapada dos<br>Guimarães, MT | FUEL056127                    |
|                   |                                                            |    | 10    | 5  | 5            | 0.78 ± 0.01 | 381.42                        | Florianópolis, SC            | FUEL056046                    |
|                   |                                                            |    | 20    | 10 | 5            | –           | –                             | –                            | Luceño <i>et al.</i> (1998)   |
|                   | 20                                                         | 10 | 5     | –  | –            | –           | Arguelho <i>et al.</i> (2012) |                              |                               |

## Table continuation....

|                                                     |    |          |   |             |          |                 |                               |
|-----------------------------------------------------|----|----------|---|-------------|----------|-----------------|-------------------------------|
|                                                     | 20 | 10       | 5 | –           | –        | Carrancas, MG   | FUEL059059                    |
|                                                     | 30 | 15       | 5 | –           | –        | –               | Luceño <i>et al.</i> (1998)   |
|                                                     | 30 | 15       | 5 | –           | –        | –               | Arguelho <i>et al.</i> (2012) |
|                                                     | –  | 20       | 5 | –           | –        | –               | Shibata (1962)                |
| <i>R. nervosa</i> subsp. <i>ciliata</i><br>T.Koyama | 10 | 5        | 5 | 1.12        | –        | –               | Ribeiro <i>et al.</i> (2017)  |
|                                                     | 10 | 5        | 5 | –           | –        | –               | Luceño <i>et al.</i> (1998)   |
|                                                     | 10 | 5        | 5 | –           | –        | –               | Arguelho <i>et al.</i> (2012) |
|                                                     | 10 | 5        | 5 | 1.11 ± 0.03 | 542.79   | UFPB, Areia, PB | FUEL056048                    |
|                                                     | 10 | 5        | 5 | 1.10 ± 0.02 | 537.90   | Areia, PB       | FUEL056047                    |
|                                                     | 10 | 5        | 5 | 1.07 ± 0.03 | 523.23   | Recife, PE      | FUEL055372                    |
| <i>R. pubera</i> (Vahl) Boeckeler                   | 10 | 5        | 5 | 3.3         | 1,613.70 | –               | Marques <i>et al.</i> (2015)  |
|                                                     | 10 | 5        | 5 | –           | –        | Recife, PE      | FUEL055374                    |
|                                                     | 10 | 5        | 5 | –           | –        | –               | Luceño <i>et al.</i> (1998)   |
|                                                     | 10 | 5        | 5 | –           | –        | –               | Arguelho <i>et al.</i> (2012) |
|                                                     | 12 | dysploid | 6 | –           | –        | –               | Arguelho <i>et al.</i> (2012) |
| <i>R. reptans</i> (Rich.) Böckeler                  | –  | c. 20    | 5 | –           | –        | –               | Thomas (1984)                 |
| <i>R. setigera</i> (Kunth.) Boeck.                  | 10 | 5        | 5 | –           | –        | –               | Luceño <i>et al.</i> (1998)   |

## Table continuation....

|                        |                                                    |       |       |   |                 |        |                 |                               |
|------------------------|----------------------------------------------------|-------|-------|---|-----------------|--------|-----------------|-------------------------------|
|                        |                                                    | 10    | 5     | 5 | $0.92 \pm 0.01$ | 449.88 | Jaguariaíva, PR | FUEL056065                    |
|                        |                                                    | 20    | 10    | 5 | –               | –      | –               | Luceño <i>et al.</i> (1998)   |
|                        | <i>R. steyermarkii</i> Koyama                      | –     | c. 10 | 5 | –               | –      | –               | Thomas (1984)                 |
| <i>Pseudocapitatae</i> | <i>R. ciliolata</i> Boeck.                         | 10    | 5     | 5 | –               | –      | –               | Vanzela <i>et al.</i> (2000)  |
|                        | <i>R. lapensis</i> C.B. Clarke                     | 20    | 10    | 5 | –               | –      | –               | Vanzela <i>et al.</i> (2000)  |
|                        | <i>R. pilosa</i> Boeckeler                         | c. 50 | 25    | 5 | –               | –      | –               | Vanzela <i>et al.</i> (2000)  |
|                        |                                                    | –     | –     | – | $0.57 \pm 0.03$ | 278.73 | Carrancas, MG   | FUEL055368                    |
|                        | <i>R. radicans</i> (Schltdl. and Cham.) H. Pfeiff. | 10    | 5     | 5 | $0.87 \pm 0.01$ | 425.43 | –               | Ribeiro <i>et al.</i> (2018)  |
|                        | <i>R. recurvata</i> (Nees) Steudel                 | 10    | 5     | 5 | –               | –      | –               | Vanzela <i>et al.</i> (2000)  |
|                        | <i>R. ridleyi</i> C.B. Clarke                      | 12    | 6     | 6 | –               | –      | –               | Vanzela <i>et al.</i> (2000)  |
|                        |                                                    | 12    | 6     | 6 | $1.02 \pm 0.01$ | 498.78 | –               | Ribeiro <i>et al.</i> (2018)  |
| <i>Psilocarya</i>      | <i>R. eximia</i> (Nees) Boeck.                     | 10    | 5     | 5 | –               | –      | –               | Vanzela <i>et al.</i> (2000)  |
|                        | <i>R. robusta</i> (Kunth.) Boeck                   | 10    | 5     | 5 | –               | –      | –               | Vanzela <i>et al.</i> (2000)  |
|                        | <i>R. velutina</i> (Kunth.) Boeck.                 | 10    | 5     | 5 | –               | –      | –               | Vanzela <i>et al.</i> (2000)  |
|                        |                                                    | 10    | 5     | 5 | –               | –      | –               | Arguelho <i>et al.</i> (2012) |
| <i>Tenues</i>          | <i>R. contracta</i> (Nees) Raynal                  | 18    | 9     | 9 | –               | –      | –               | Vanzela <i>et al.</i> (2000)  |
|                        | <i>R. emaciata</i> (Nees) Boeck.                   | 10    | 9     | 5 | –               | –      | –               | Vanzela <i>et al.</i> (2000)  |

## Table continuation....

|                                                            |    |         |   |             |         |                    |                                          |
|------------------------------------------------------------|----|---------|---|-------------|---------|--------------------|------------------------------------------|
| <i>R. junciformis</i>                                      | 18 | 9       | 9 | –           | –       | –                  | Arguelho <i>et al.</i> (2012)            |
| <i>R. nanuzae</i> Luceño and Rocha                         | 10 | 5       | 5 | –           | –       | –                  | Vanzela <i>et al.</i> (2000)             |
| <i>R. riparia</i> (Nees) Boeckeler                         | 10 | 5       | 5 | –           | –       | –                  | Vanzela <i>et al.</i> (2000)             |
|                                                            | 10 | 5       | 5 | 0.64 ± 0.01 | 312.96  | Parque Guariba, PB | FUEL056070                               |
| <i>R. spruceana</i> C.B.Clarke                             | 13 | dyploid | 5 | –           | –       | –                  | Gadela and Kliphuis (1963)               |
| <i>R. tenuis</i> Link                                      | 4  | dyploid | 5 | 0,78        | 381.42  | –                  | Feitoza <i>et al.</i> (unpublished data) |
|                                                            | 4  | dyploid | 5 | –           | –       | –                  | Vanzela <i>et al.</i> (2000)             |
|                                                            | 4  | dyploid | 5 | –           | –       | –                  | Arguelho <i>et al.</i> (2012)            |
|                                                            | 4  | dyploid | 5 | 0.80 ± 0.02 | 391.20  | Itapoá, PR         | FUEL056042                               |
|                                                            | 5  | dyploid | 5 | –           | –       | –                  | Arguelho <i>et al.</i> (2012)            |
|                                                            | 6  | dyploid | 5 | 0.83 ± 0.04 | 405.87  | Carrancas, MG      | FUEL056043                               |
|                                                            | 8  | dyploid | 5 | –           | –       | –                  | Vanzela <i>et al.</i> (1996)             |
|                                                            | 10 | 5       | 5 | –           | –       | –                  | Gadela and Kliphuis (1964)               |
| <i>R. tenuis</i> subsp. <i>austrobrasiliensis</i> T.Koyama | 18 | dyploid | 5 | –           | –       | –                  | Vanzela <i>et al.</i> (2000)             |
|                                                            | 18 | dyploid | 5 | –           | –       | –                  | Arguelho <i>et al.</i> (2012)            |
|                                                            | 18 | dyploid | 5 | 2.32 ± 0.03 | 1134.48 | Antonina, PR       | FUEL056071                               |

## Table continuation....

|                     |                                        |    |          |   |             |        |              |                               |
|---------------------|----------------------------------------|----|----------|---|-------------|--------|--------------|-------------------------------|
| <i>Spermodontes</i> | <i>R. brevirostres</i> Griseb.         | 10 | 5        | 5 | –           | –      | –            | Vanzela <i>et al.</i> (2000)  |
|                     |                                        | 10 | 5        | 5 | –           | –      | –            | Vanzela <i>et al.</i> (2000)  |
|                     | <i>R. confinis</i> (Nees) C.B. Clarke  | 20 | 10       | 5 | –           | –      | –            | Vanzela <i>et al.</i> (2000)  |
|                     | <i>R. filiformis</i> Vahl              | 10 | 5        | 5 | –           | –      | –            | Vanzela <i>et al.</i> (2000)  |
|                     | <i>R. graminea</i> Uitt.               | 13 | dysploid | 5 | –           | –      | –            | Gadela and Kliphuis (1964)    |
|                     | <i>R. tenerrima</i> Nees ex Spreng.    | 20 | 10       | 5 | –           | –      | –            | Vanzela <i>et al.</i> (2000)  |
|                     |                                        | 20 | 10       | 5 | –           | –      | –            | Arguelho <i>et al.</i> (2012) |
|                     |                                        | 20 | 10       | 5 | 1.14 ± 0.05 | 557.46 | Antonina, PR | FUEL056041                    |
|                     |                                        | –  | –        | 5 | 1.14 ± 0.03 | 557.46 | Areia, PB    | FUEL056069                    |
|                     |                                        | 20 | 10       | 5 | 1.13 ± 0.03 | 552.57 | Tupã, SP     | FUEL056040                    |
|                     |                                        | 20 | 10       | 5 | 1.25 ± 0.01 | 611.25 | –            | Ribeiro <i>et al.</i> (2018)  |
| <i>Valderugosae</i> | <i>R. microcarpa</i> Baldw. ex A. Gray | 36 | 18       | 6 | –           | –      | –            | Vanzela <i>et al.</i> (2000)  |
| <i>Fuscae</i>       | <i>R. fusca</i> (L.) Aiton f.          | 26 | 13       | 6 | –           | –      | –            | Löve and Löve (1982)          |
| <i>Albae</i>        | <i>R. alba</i> (L.) Vahl               | 26 | 13       | 6 | –           | –      | –            | Gadela and Kliphuis (1963)    |
|                     |                                        | 26 | 13       | 6 | –           | –      | –            | Dietrich (1972)               |
|                     |                                        | 26 | 13       | 6 | –           | –      | –            | Vachova (1976)                |
|                     |                                        | 26 | 13       | 6 | –           | –      | –            | Pogan <i>et al.</i> (1980)    |

## Table continuation....

|                                                       |       |    |   |             |        |               |                              |
|-------------------------------------------------------|-------|----|---|-------------|--------|---------------|------------------------------|
|                                                       | 26    | 13 | 6 | –           | –      | –             | Löve and Löve (1981)         |
|                                                       | 26    | 13 | 6 | –           | –      | –             | Löve and Löve (1982)         |
|                                                       | 26    | 13 | 6 | –           | –      | –             | Hoshino (1987 <i>b</i> )     |
|                                                       | –     | 13 | 6 | –           | –      | –             | Taylor and Mulligan (1968)   |
|                                                       | –     | 13 | 6 | –           | –      | –             | Pojar (1973)                 |
| <i>R. capillacea</i> Torrey                           | 26    | 13 | 6 | –           | –      | –             | Löve and Löve (1981)         |
| <i>R. faberi</i> C.B. Clarke                          | 24    | 12 | 6 | –           | –      | –             | Hoshino (1987 <i>b</i> )     |
| <i>R. faurieri</i> Franch.                            | 62    | 31 | – | –           | –      | –             | Hoshino (1987 <i>b</i> )     |
| <i>Glaucae</i>                                        |       |    |   |             |        |               |                              |
| <i>R. barrosiana</i> Guagl.                           | 36    | 18 | 6 | –           | –      | –             | Vanzela <i>et al.</i> (2000) |
|                                                       | 36    | 18 | 6 | 0.54 ± 0.02 | 264.06 | Tibagi, PR    | FUEL056061                   |
| <i>R. brasiliensis</i> Boeck.                         | c. 36 | –  | 6 | –           | –      | –             | Vanzela <i>et al.</i> (2000) |
| <i>R. brownii</i> Roem. and Sch.                      | 34    | 17 | 6 | –           | –      | –             | Hoshino (1987 <i>b</i> )     |
| <i>R. brownii</i> subsp. <i>americana</i> Guaglianone | 36    | 18 | 6 | –           | –      | –             | Vanzela <i>et al.</i> (2000) |
| <i>R. chinensis</i> Böckeler                          | 62    | 31 | 6 | –           | –      | –             | Hoshino (1987 <i>b</i> )     |
| <i>R. dissitispicula</i> T.Koyama                     | 36    | 18 | 6 | 0.56 ± 0.02 | 273.84 | Carrancas, MG | FUEL056050                   |
| <i>R. flexuosa</i> C.B. Clarke                        | 36    | 18 | 6 | –           | –      | –             | Vanzela <i>et al.</i> (2000) |
| <i>R. fujiana</i> Mak.                                | 26    | 13 | 6 | –           | –      | –             | Hoshino (1987 <i>b</i> )     |

## Table continuation....

|                     |                                           |    |          |   |                 |        |                    |                               |
|---------------------|-------------------------------------------|----|----------|---|-----------------|--------|--------------------|-------------------------------|
|                     | <i>R. marisculus</i> Lindl. and Nees      | 30 | 15       | 6 | –               | –      | –                  | Dopchiz et al. (2000)         |
|                     |                                           | 36 | 18       | 6 | –               | –      | –                  | Vanzela <i>et al.</i> (2000)  |
|                     |                                           | 36 | 18       | 6 | –               | –      | –                  | Arguelho <i>et al.</i> (2012) |
|                     |                                           | 36 | 18       | 6 | $0.53 \pm 0.01$ | 259.17 | Parque Guariba, PB | FUEL056051                    |
|                     | <i>R. rugosa</i> (Vahl) Gale              | 36 | 18       | 6 | –               | –      | –                  | Vanzela <i>et al.</i> (2000)  |
|                     |                                           | 36 | 18       | 6 | $0.51 \pm 0.03$ | 249.39 | Carrancas, MG      | FUEL056067                    |
|                     | <i>R. spiciformis</i> Hillebr.            | 48 | 24       | 6 | –               | –      | –                  | Skottsberg (1955)             |
| <i>Cephalotae</i>   | <i>R. cephalotes</i> (L.) Vahl            | 17 | dysploid | 9 | –               | –      | –                  | Luceño et al. (1998b)         |
|                     |                                           | 18 | 9        | 9 | –               | –      | –                  | Luceño et al. (1998b)         |
|                     |                                           | 18 | 9        | 9 | –               | –      | –                  | Vanzela <i>et al.</i> (2000)  |
|                     |                                           | 18 | 9        | 9 | $0.68 \pm 0.02$ | 332.52 | Areia, PB          | FUEL056039                    |
|                     |                                           | 19 | dysploid | 9 | –               | –      | –                  | Luceño et al. (1998b)         |
|                     |                                           | 18 | 9        | 9 | $0.76 \pm 0.01$ | 371.64 | –                  | Ribeiro <i>et al.</i> (2018)  |
|                     | <i>R. comata</i> (L.) Roemer and Schultes | 18 | 9        | 9 | –               | –      | –                  | Vanzela <i>et al.</i> (2000)  |
| <i>Polycephalae</i> | <i>R. exaltata</i> Kunth                  | 20 | 10       | 5 | –               | –      | –                  | Luceño <i>et al.</i> (1998)   |
|                     |                                           | 20 | 10       | 5 | –               | –      | –                  | Luceño <i>et al.</i> (1998)   |
|                     | <i>R. glaziovii</i> Boeckeler             | 10 | 5        | 5 | –               | –      | –                  | Luceño <i>et al.</i> (1998)   |

## Table continuation....

|                    |                                                |    |         |   |                 |          |                           |                               |
|--------------------|------------------------------------------------|----|---------|---|-----------------|----------|---------------------------|-------------------------------|
|                    |                                                | –  | –       | – | $0.91 \pm 0.01$ | 444.99   | Campina Grande do Sul, PR | FUEL056036                    |
|                    | <i>R. holoschoenoides</i> (Rich.)<br>Herter    | 10 | 5       | 5 | –               | –        | –                         | Luceño <i>et al.</i> (1998)   |
|                    |                                                | 20 | 10      | 5 | –               | –        | –                         | Luceño <i>et al.</i> (1998)   |
|                    |                                                | 20 | 10      | 5 | $1.04 \pm 0.02$ | 508.56   | Antonina, PR              | FUEL056037                    |
|                    |                                                | 20 | 10      | 5 | $0.98 \pm 0.05$ | 479.22   | Campo Largo, PR           | FUEL055371                    |
|                    |                                                | 20 | 10      | 5 | $1.25 \pm 0.03$ | 611.25   | –                         | Ribeiro <i>et al.</i> (2018)  |
| <i>Pluriflorae</i> | <i>R. albiceps</i> Kunth.                      | 20 | 10      | 5 | –               | –        | –                         | Vanzela <i>et al.</i> (2000)  |
|                    | <i>R. albobracteata</i> A.C.Araújo             | 20 | 10      | 5 | –               | –        | Carrancas, MG             | FUEL055369                    |
|                    | <i>R. consanguinea</i> (Kunth.)<br>Kükenth.    | 10 | 5       | 5 | –               | –        | –                         | Vanzela <i>et al.</i> (2000)  |
|                    | <i>R. diamantina</i> (C.B. Clarke)<br>Kükenth. | 24 | 12      | 6 | –               | –        | –                         | Luceño <i>et al.</i> (1998)   |
|                    | <i>R. elatior</i> Kunth                        | 12 | 6       | 6 | –               | –        | –                         | Ribeiro <i>et al.</i> (2018)  |
|                    | <i>R. globosa</i> (Kunth) Roem.<br>and Schult. | 24 | dyploid | 5 | –               | –        | –                         | Luceño <i>et al.</i> (1998)   |
|                    |                                                | 36 | dyploid | 5 | –               | –        | Chapadão do Céu, GO       | FUEL056063                    |
|                    |                                                | 36 | dyploid | 5 | –               | –        | –                         | Arguelho <i>et al.</i> (2012) |
|                    |                                                | 37 | dyploid | 5 | –               | –        | –                         | Luceño <i>et al.</i> (1998)   |
|                    |                                                | 43 | dyploid | 5 | $6.63 \pm 0.03$ | 3,242.07 | Jaguariaíva, PR           | FUEL056055                    |
|                    |                                                | 45 | dyploid | 5 | –               | –        | –                         | Arguelho <i>et al.</i> (2012) |



## Table continuation....

|                     |                                                                 |       |         |   |              |          |                              |                                  |
|---------------------|-----------------------------------------------------------------|-------|---------|---|--------------|----------|------------------------------|----------------------------------|
|                     |                                                                 | 48    | dyploid | 5 | –            | –        | –                            | Luceño <i>et al.</i> (1998)      |
|                     |                                                                 | 48    | dyploid | 5 | –            | –        | Chapada dos<br>Guimarães, MT | FUEL056126                       |
|                     |                                                                 | 49    | dyploid | 5 | 9.16 ± 0.03  | 4,479.24 | Tibagi, PR                   | FUEL056056                       |
|                     |                                                                 | 50    | dyploid | 5 | –            | –        | –                            | Ribeiro <i>et al.</i> (2018)     |
|                     |                                                                 | 58    | dyploid | 5 | –            | –        | –                            | Arguelho <i>et al.</i> (2012)    |
|                     |                                                                 | 61    | dyploid | 5 | 11.32 ± 0.05 | 5,535.5  | Carrancas, MG                | FUEL056057                       |
|                     | <i>R. riedeliana</i> C.B. Clarke                                | 12    | 6       | 6 | –            | –        | –                            | Vanzela <i>et al.</i> (2000)     |
|                     | <i>R. rubra</i> (Lour.) Makino                                  | 20    | 10      | 5 | –            | –        | –                            | Hoshino (1987b)                  |
|                     | <i>R. speciosa</i> (Kunth.) Kunth.                              | 20    | 10      | 5 | –            | –        | –                            | Vanzela <i>et al.</i> (2000)     |
|                     | <i>R. terminalis</i> var.<br><i>rosemariana</i> (D. A. Simpson) | 10    | 5       | 5 | 0.81 ± 0.01  | 396.09   | Tibagi, PR                   | FUEL056058                       |
|                     |                                                                 | 50    | 25      | 5 | –            | –        | –                            | Luceño <i>et al.</i> (1998)      |
|                     | <i>R. warmingii</i> Boeck.                                      | c. 30 | –       | 5 | –            | –        | –                            | Vanzela <i>et al.</i> (2000)     |
| <i>Pauciflorae</i>  | <i>R. armerioides</i> J. Presl and C. Presl.                    | 10    | 5       | 5 | –            | –        | –                            | Luceño <i>et al.</i> (1998)      |
| <i>Pauciflorae</i>  | <i>R. barbata</i> (Vahl) Kunth                                  | 10    | 5       | 5 | –            | –        | –                            | Vanzela <i>et al.</i> (2000)     |
|                     |                                                                 | 10    | 5       | 5 | 1.28 ± 0.02  | 625.92   | Parque Guariba, PB           | FUEL056054                       |
| <i>Longirostres</i> | <i>R. asperula</i>                                              | 18    | 9       | 9 | –            | –        | –                            | Arguelho <i>et al.</i> (2012)    |
|                     | <i>R. corymbosa</i> (L.) Britton                                | 18    | 9       | 9 | –            | –        | –                            | Nijalingapa <i>et al.</i> (1978) |

## Table continuation....

|                                        |    |   |   |                 |        |                    |                               |
|----------------------------------------|----|---|---|-----------------|--------|--------------------|-------------------------------|
|                                        | 18 | 9 | 9 | –               | –      | –                  | Baquar (1978)                 |
|                                        | 18 | 9 | 9 | –               | –      | –                  | Luceño <i>et al.</i> (1998)   |
|                                        | 18 | 9 | 9 | –               | –      | –                  | Arguelho <i>et al.</i> (2012) |
|                                        | 18 | 9 | 9 | $0.77 \pm 0.02$ | 376.53 | Prado Ferreira, PR | FUEL056053                    |
| <i>R. gigantea</i> Link                | 18 | 9 | 9 | –               | –      | –                  | Luceño <i>et al.</i> (1998)   |
|                                        | 18 | 9 | 9 | –               | –      | –                  | Arguelho <i>et al.</i> (2012) |
| <i>R. legrandii</i> Kükenth. ex Barros | 18 | 9 | 9 | –               | –      | –                  | Luceño <i>et al.</i> (1998)   |
| <i>R. pedersenii</i> Guagl.            | 18 | 9 | 9 | $0.73 \pm 0.04$ | 356.97 | Antonina, PR       | FUEL056073                    |
| <i>R. scutellata</i> Griseb.           | 18 | 9 | 9 | –               | –      | –                  | Luceño <i>et al.</i> (1998)   |
| <i>R. triflora</i> Vahl                | 18 | 9 | 9 | –               | –      | –                  | Luceño <i>et al.</i> (1998)   |

**Note:** Values preceded by *c.* have uncertain numbers of chromosomes.

**Supplemental data 2.** List of species of *Rhynchospora* and deposit numbers of the chloroplast sequences. Sequences were deposited in batches per species in the NCBI database. All genomes were made available by C. Buddenhagen (not yet published).

| Taxa                                               | GenBank<br>accession/Submission ID |
|----------------------------------------------------|------------------------------------|
| <i>R. alba</i> (L.) Vahl                           | 2312461                            |
| <i>R. albiceps</i> Kunth.                          | 2343194                            |
| <i>R. barbata</i> (Vahl) Kunth                     | 2343202                            |
| <i>R. barrosiana</i> Guagl.                        | 2343212                            |
| <i>R. brasiliensis</i> Boeck.                      | 2343222                            |
| <i>R. breviuscula</i> H.Pfeiff.                    | 2343226                            |
| <i>R. cephalotes</i> (L.) Vahl                     | 2343232                            |
| <i>R. chinensis</i> Böckeler                       | 2343237                            |
| <i>R. nervosa</i> subsp. <i>ciliata</i> T.Koyama   | 2343297                            |
| <i>R. ciliolata</i> Boeck.                         | 2343339                            |
| <i>R. colorata</i> (L.) Hitchc.                    | 2343342                            |
| <i>R. comata</i> (L.) Roemer and Schultes          | 2343344                            |
| <i>R. consanguinea</i> (Kunth.) Kükenth.           | 2343347                            |
| <i>R. corymbosa</i> (L.) Britton                   | 2343799                            |
| <i>R. emaciata</i> (Nees) Boeck.                   | 2343804                            |
| <i>R. exaltata</i> Kunth                           | 2343811                            |
| <i>R. eximia</i> (Nees) Boeck.                     | 2343819                            |
| <i>R. fusca</i> (L.) Aiton f.                      | 2343823                            |
| <i>R. gigantea</i> Link                            | 2343828                            |
| <i>R. glaziovii</i> Boeckeler                      | 2343846                            |
| <i>R. globosa</i> (Kunth) Roem. and Schult.        | 2343861                            |
| <i>R. holoschoenoides</i> (Rich.) Herter           | 2343865                            |
| <i>R. marisculus</i> Lindl. and Nees               | 2343868                            |
| <i>R. microcarpa</i> Baldw. ex A. Gray             | 2343872                            |
| <i>R. pubera</i> (Vahl) Boeckeler                  | 2343874                            |
| <i>R. radicans</i> (Schltdl. and Cham.) H. Pfeiff. | 2343882                            |
| <i>R. riedeliana</i> C.B. Clarke                   | 2343883                            |
| <i>R. riparia</i> (Nees) Boeckeler                 | 2343904                            |
| <i>R. robusta</i> (Kunth.) Boeck                   | 2343906                            |

| <b>Taxa</b>                          | <b>GenBank<br/>accession/Submission ID</b> |
|--------------------------------------|--------------------------------------------|
| <i>R. rubra</i> (Lour.) Makino       | 2343909                                    |
| <i>R. rugosa</i> (Vahl) Gale         | 2343912                                    |
| <i>R. speciosa</i> (Kunth.) Kükenth. | 2343916                                    |
| <i>R. tenerrima</i> Nees ex Spreng.  | 2343919                                    |
| <i>R. tenuis</i> Link                | 2343923                                    |
| <i>R. wightiana</i> (Nees) Steudel   | 2343929                                    |

**Supplementary data 3.** Chloroplast coding sequences used and the percentage of pairwise residues that are identical in the alignment.

| <b>cpDNA genes</b> | <b>% Pairwise identity</b> |
|--------------------|----------------------------|
| <i>atpA</i>        | 95.9                       |
| <i>atpB</i>        | 95.8                       |
| <i>atpE</i>        | 95.2                       |
| <i>atpF</i>        | 94.5                       |
| <i>atpH</i>        | 97.0                       |
| <i>atpI</i>        | 96.7                       |
| <i>cemA</i>        | 94.9                       |
| <i>matK</i>        | 88.7                       |
| <i>ndhC</i>        | 96.6                       |
| <i>ndhD</i>        | 95.0                       |
| <i>ndhE</i>        | 93.5                       |
| <i>ndhF</i>        | 93.5                       |
| <i>ndhG</i>        | 97.7                       |
| <i>ndhJ</i>        | 95.8                       |
| <i>ndhK</i>        | 95.2                       |
| <i>petA</i>        | 96.2                       |
| <i>petB</i>        | 97.5                       |
| <i>petD</i>        | 97.4                       |
| <i>petG</i>        | 97.2                       |
| <i>petL</i>        | 95.0                       |
| <i>petN</i>        | 97.4                       |
| <i>psaA</i>        | 97.1                       |

| cpDNA genes  | % Pairwise identity |
|--------------|---------------------|
| <i>psaB</i>  | 97.2                |
| <i>psaC</i>  | 96.9                |
| <i>psaI</i>  | 96.9                |
| <i>psaJ</i>  | 96.4                |
| <i>psbA</i>  | 97.7                |
| <i>psbB</i>  | 97.4                |
| <i>psbC</i>  | 97.7                |
| <i>psbD</i>  | 97.9                |
| <i>psbE</i>  | 97.9                |
| <i>psbF</i>  | 98.4                |
| <i>psbH</i>  | 96.5                |
| <i>psbI</i>  | 96.0                |
| <i>psbJ</i>  | 97.3                |
| <i>psbK</i>  | 97.5                |
| <i>psbL</i>  | 98.4                |
| <i>psbM</i>  | 98.5                |
| <i>psbN</i>  | 97.1                |
| <i>psbT</i>  | 97.0                |
| <i>psbZ</i>  | 97.2                |
| <i>rbcL</i>  | 96.7                |
| <i>rpl14</i> | 95.8                |
| <i>rpl16</i> | 95.6                |
| <i>rpl22</i> | 93.2                |
| <i>rpl36</i> | 94.2                |
| <i>rpoB</i>  | 94.3                |
| <i>rpoC1</i> | 92.7                |
| <i>rpoC2</i> | 88.4                |
| <i>rps2</i>  | 92.4                |
| <i>rps8</i>  | 94.4                |
| <i>rps14</i> | 93.2                |
| <i>yef3</i>  | 96.1                |
| <i>yef4</i>  | 94.8                |

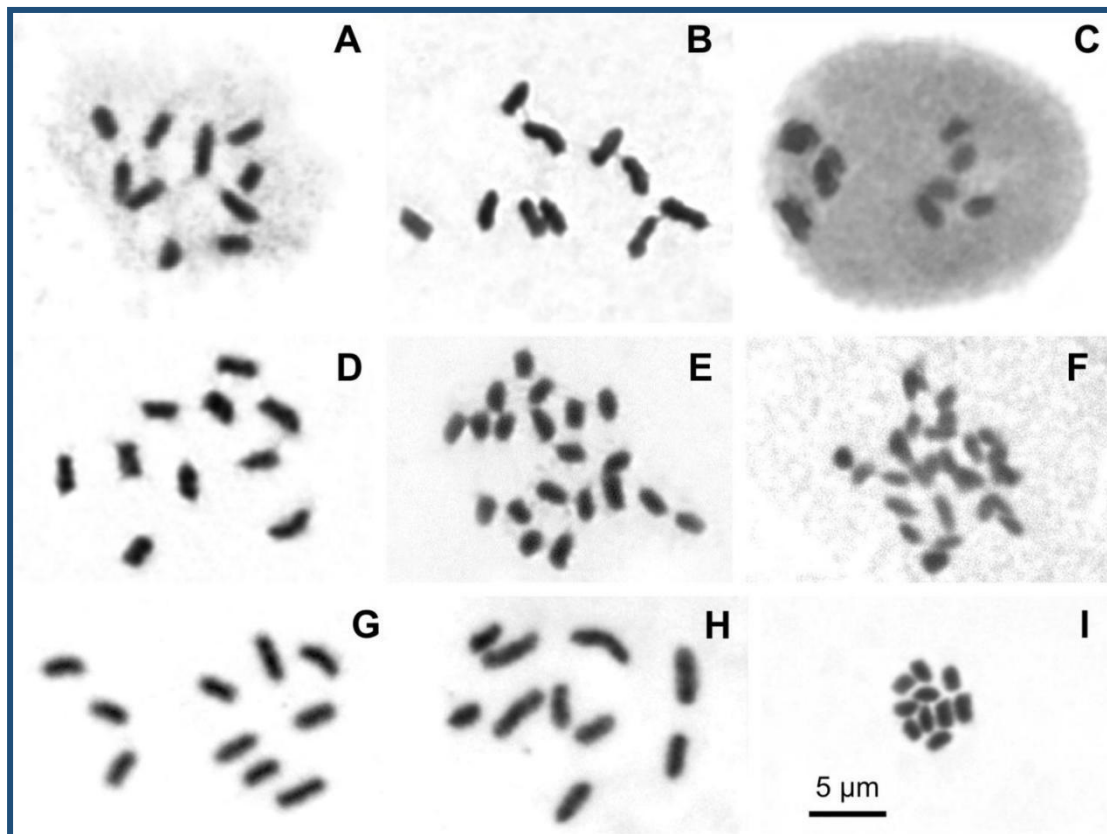

**Supplemental data 4.** Mitotic chromosomes of *Rhynchospora* sect. *Dichromena*. Metaphase of *R. breviuscula*  $2n = 10$  (A). Metaphase of *R. nervosa* with  $2n = 10$  from Chapada dos Guimarães (B). Pseudomonad of *R. nervosa* showing the degenerative domain (left) and the functional domain (right), which is at metaphase of pollen mitosis ( $n = 5$ ) (C). Metaphase of *R. nervosa* with  $2n = 10$  from Florianópolis (D). Metaphase of *R. nervosa* with  $2n = 20$  (E). Metaphase of *R. nervosa* with  $2n = 30$  from Cabo do Santo Agostinho (F). Metaphase of *R. nervosa* subsp. *ciliata* with  $2n = 10$  (G). Metaphase of *R. pubera* with  $2n = 10$  (H). Metaphase of *R. setigera* with  $2n = 10$  (I). All species present the same basic chromosome number  $x = 5$ , similar karyotypes in symmetry, and chromosome sizes decrease as chromosome numbers increase. Note that *R. setigera* has the smallest chromosomes, while *R. pubera* has the largest ones. Three ploidy levels are represented for *R. nervosa* (B–F).

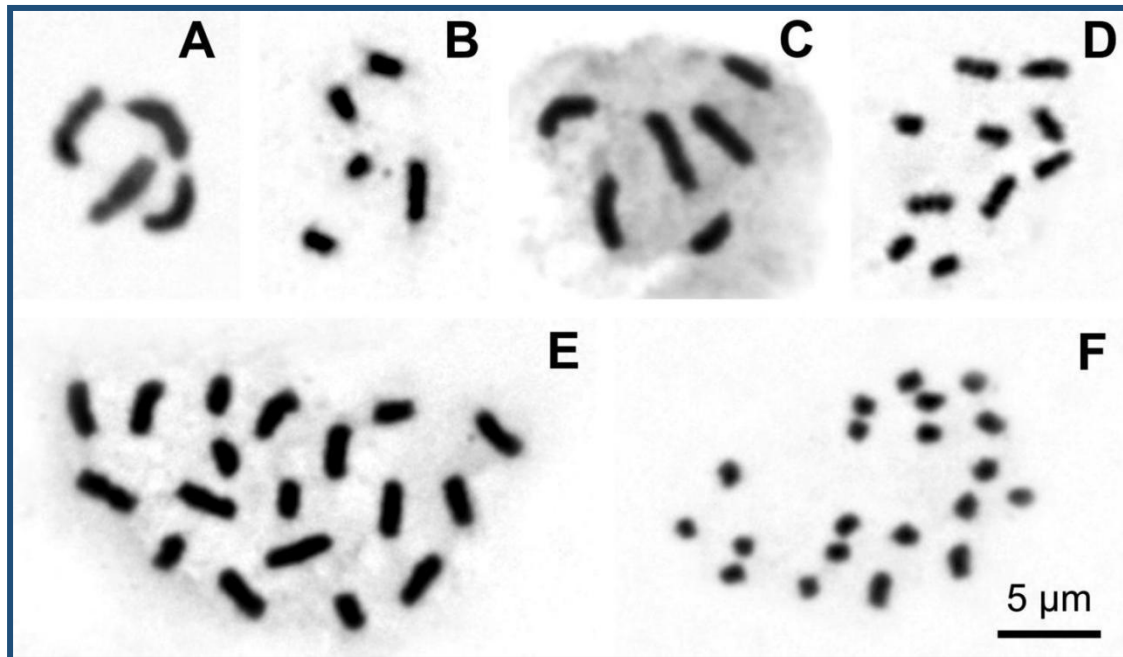

**Supplemental data 5.** Mitotic chromosomes of *Rhynchospora* sect. *Tenues* (A–E) and sect. *Spermodontes* (F). Prometaphase of *R. tenuis* ( $2n = 4$ ) (A). Metaphase of *R. tenuis* ( $2n = 5$ ) (B). Prometaphases of *R. tenuis* ( $2n = 6$ ) (C). Metaphase of *R. riparia* ( $2n = 10$ ) (D). Metaphase of *R. tenuis* subsp. *austrobrasiliensis* ( $2n = 18$ ) (E). Metaphase of *R. tenerrima* ( $2n = 20$ ) (F). Note that sect. *Tenues* spp. display a variety of chromosome numbers, including dysploid karyotypes (A–C), dysploid associated with polyploidy (E) and the polyploid *R. tenerrima* (F) with much smaller chromosomes than other species from this section.

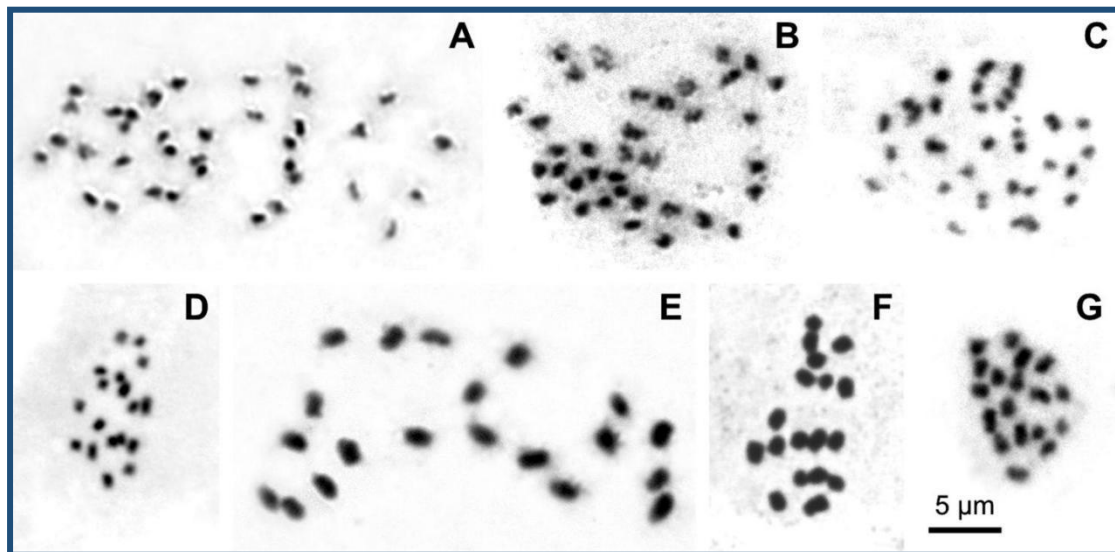

**Supplemental data 6.** Mitotic chromosomes of polyploids from four sections of *Rhynchospora* are shown: sect. *Glaucæ* (A–C), sect. *Cephalotæ* (D), sect. *Polycephalæ* (E), and sect. *Longirostres* (F–G). Prometaphases of *R. rugosa*, *R. marisculus* and *R. dissitispicula* (respectively) from sect. *Glaucæ*, all with  $2n = 36$  (A–C). Metaphase of *R. cephalotes* (sect. *Cephalotæ*) with  $2n = 18$  (D). Metaphase of *R. holoschoenoides* (sect. *Polycephalæ*) with  $2n = 20$  (E). Metaphase of *R. corymbosa* and prometaphase of *R. pedersenii* (sect. *Longirostres*), both with  $2n = 18$  (F–G). Three basic chromosome numbers are represented in this picture:  $x = 6$  (A–C),  $x = 9$  (D, F–G) and  $x = 5$  (D). Higher ploidy species, from sect. *Glaucæ* (A–C), and *R. cephalotes* (D) have considerably smaller chromosomes compared to any other *Rhynchospora* spp. shown herein.



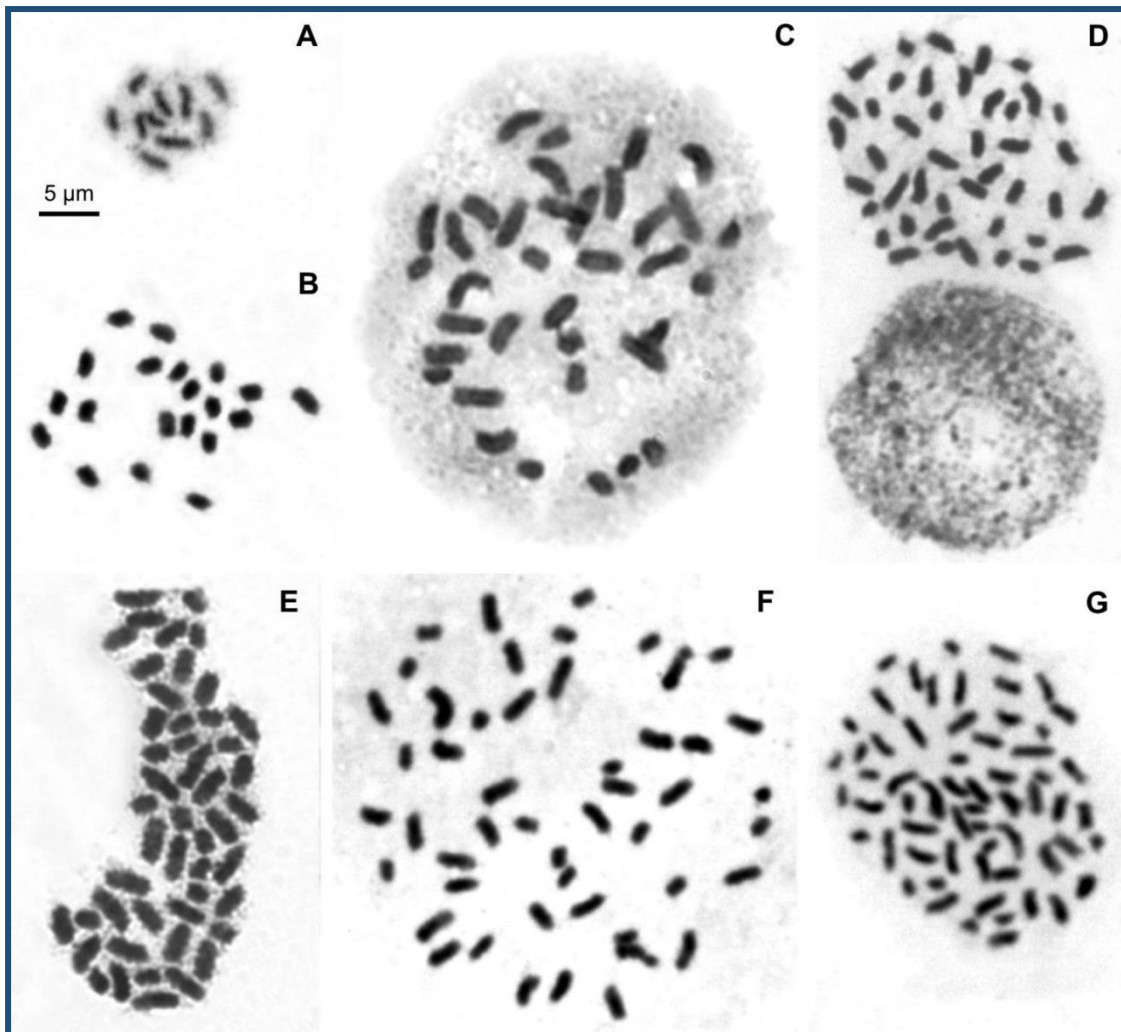

**Supplemental data 7.** Mitotic chromosomes of *Rhynchospora* sect. *Pluriflorae*. Prometaphase of *R. terminalis* var. *rosemariana* with  $2n = 10$  (A). Metaphase of *R. albobracteata* with  $2n = 20$  (B). Metaphase of *R. globosa* with  $2n = 36$  (C). Metaphase (top) of *R. globosa* with  $2n = 43$ , and interphase nucleus (bottom) showing numerous chromocenters (D). Metaphase of *R. globosa* with  $2n = 48$  (E). Metaphase of *R. globosa* with  $2n = 49$  (F). Prometaphase of *R. globosa* with  $2n = 61$  (G). Species from this section have chromosome numbers derived from  $x = 5$  with *R. globosa* (C–G) presenting dysploidy associated with polyploidy. *Rhynchospora globosa* stands out as having the most diverse karyotype regarding chromosome number and size within a chromosome complement.

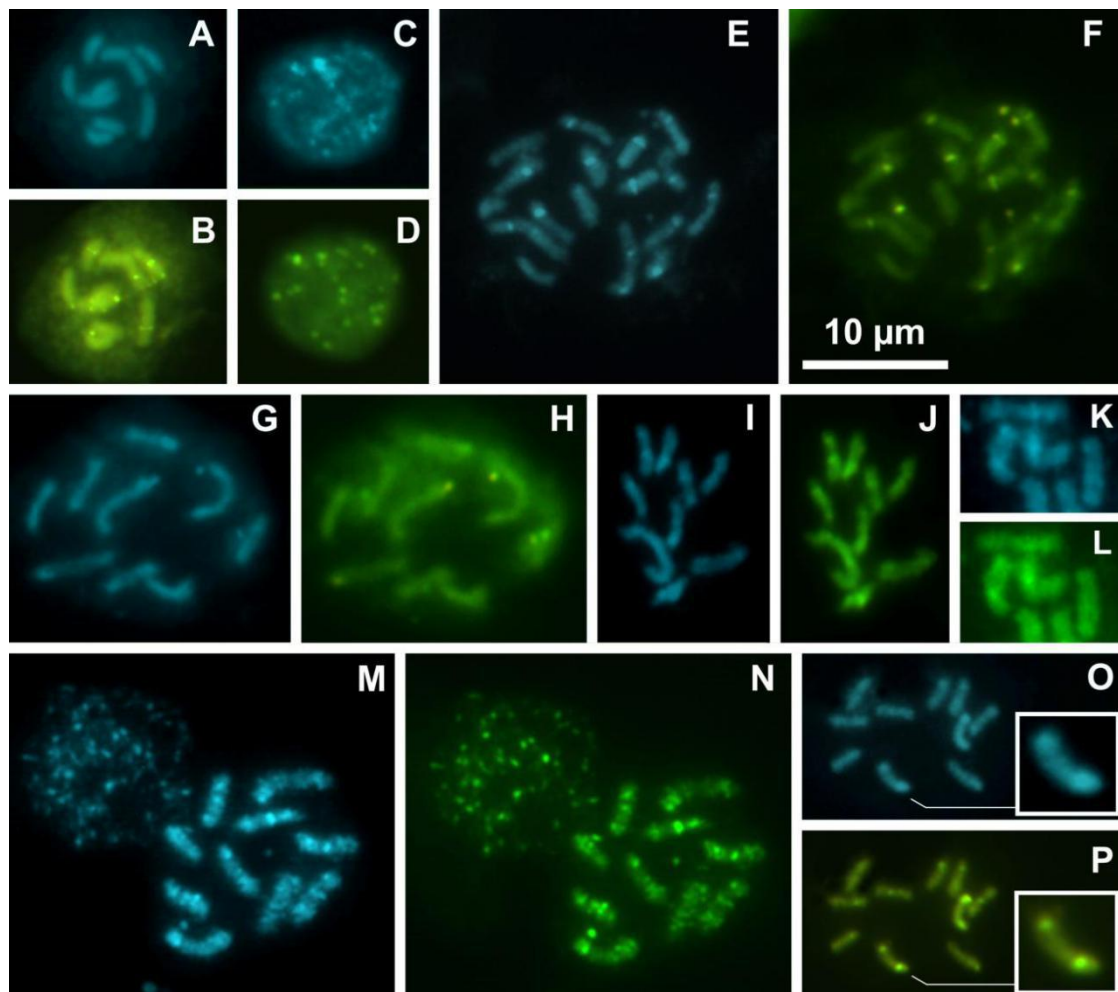

**Supplemental data 8.** C-CMA/DAPI banding in mitotic chromosomes and interphase nuclei of *Rhynchospora* sect. *Dichromena*. Prometaphase in *R. breviscula* ( $2n = 10$ ) with either DAPI<sup>0</sup>/CMA<sup>+</sup> or DAPI<sup>+</sup>/CMA<sup>+</sup> bands (A–B). Nucleus of *R. breviscula* with DAPI<sup>+</sup>/CMA<sup>+</sup> chromocenters (C–D). Prometaphases in *R. nervosa* from Carrancas with  $2n = 20$  (E–F), from Florianópolis with  $2n = 10$  (G–H), and from Chapada dos Guimarães, with  $2n = 10$  (I–J). CMA and DAPI heterochromatin are differently accumulated among chromosomes of *R. nervosa* from Chapada dos Guimarães (K–L), with chromosomes either exhibiting only DAPI<sup>+</sup> bands, terminal and interstitial DAPI<sup>+</sup>/CMA<sup>+</sup> bands, one interstitial DAPI<sup>+</sup>/CMA<sup>+</sup> band, or none at all. Prometaphase in *R. nervosa* subsp. *ciliata* ( $2n = 10$ ) showing many DAPI<sup>+</sup>/CMA<sup>+</sup> signals, also visible in the nucleus (M–N). Prometaphase of *R. setigera* with DAPI<sup>+</sup>/CMA<sup>+</sup> signals (I–J). Metaphase and prometaphase, respectively, in *R. nervosa* ( $2n = 20$ ) (O–P). DAPI<sup>+</sup> bands are all interstitial (O) while CMA<sup>+</sup> bands are either interstitial or terminal (P). One chromosome with two large blocks of DAPI<sup>+</sup>/CMA<sup>+</sup> heterochromatin, one terminal and the other subterminal, is depicted in detail (box).

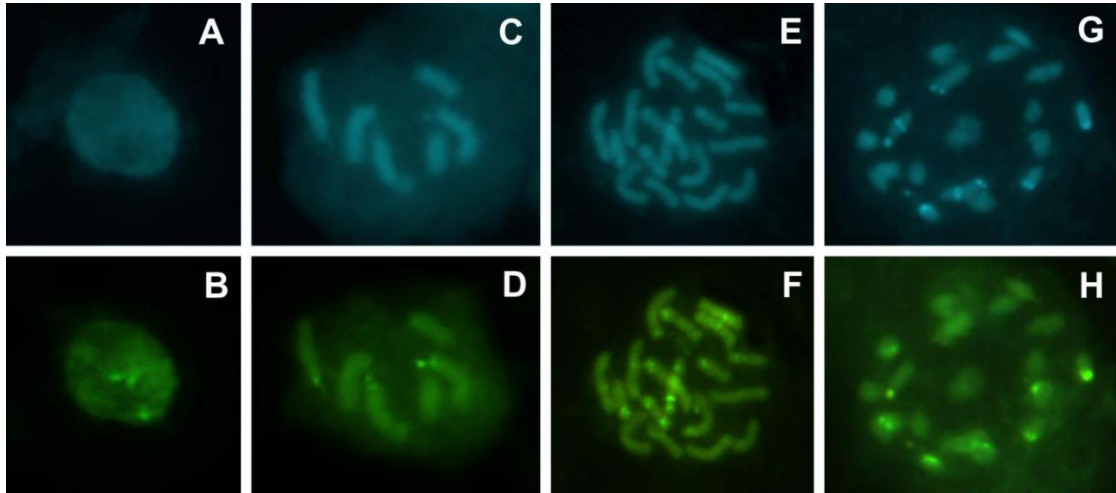

**Supplemental data 9.** C-CMA/DAPI banding in mitotic chromosomes and interphase nucleus of *Rhynchospora* sect. *Tenuis* (A–F) and sect. *Spermodontes* (G–H). Nucleus and prometaphase of *R. tenuis* with  $2n = 6$  showing the absence of DAPI<sup>+</sup> signals, and only three terminal CMA<sup>+</sup> ones (A–D). Metaphase in *R. tenuis* subsp. *austrobrasiliensis* ( $2n = 18$ ) showing CMA<sup>+</sup> signals (E–F). Note the presence of several CMA<sup>+</sup> bands distributed throughout one chromosome. Prometaphase in *R. tenerrima* ( $2n = 20$ ) with DAPI<sup>+</sup>/CMA<sup>+</sup> and DAPI<sup>+</sup>/CMA<sup>0</sup> blocks (G–H).

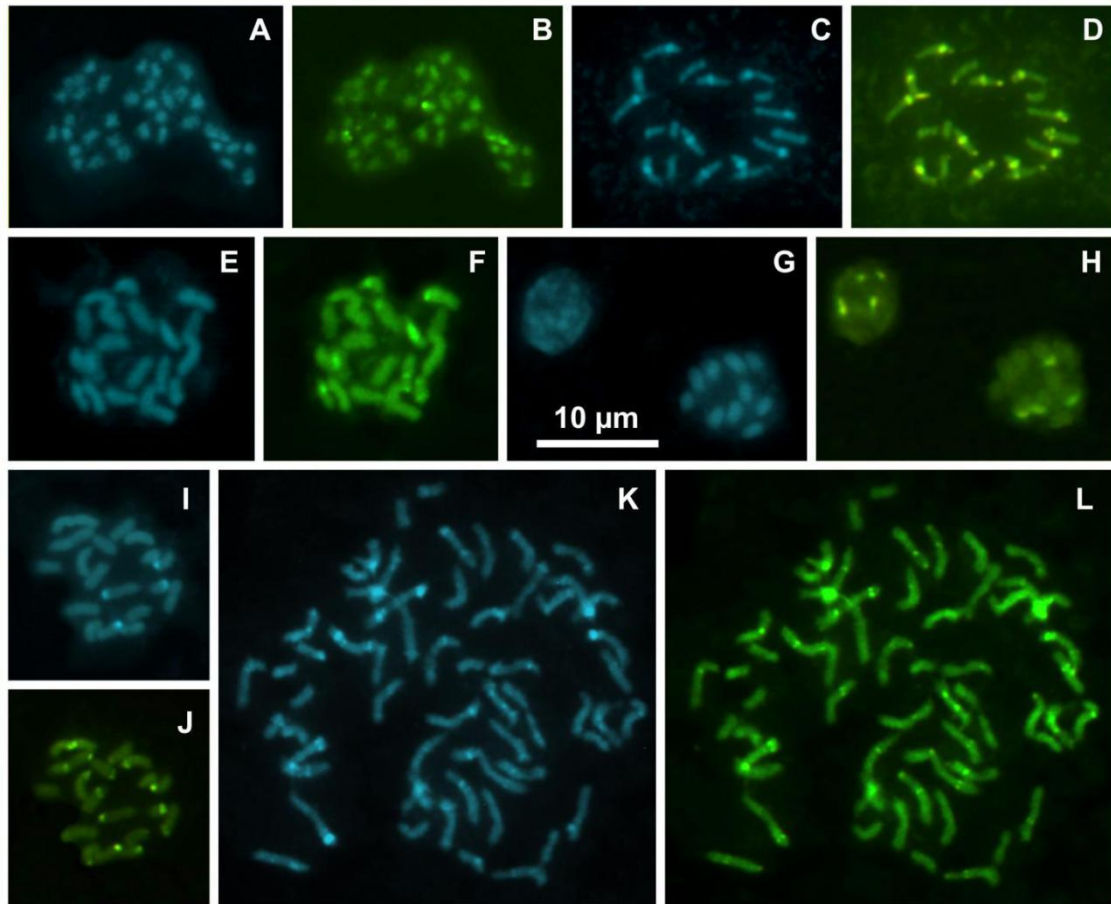

**Supplemental data 10.** C-CMA/DAPI banding in mitotic chromosomes and interphase nuclei of *Rhynchospora*. Prometaphase of *R. rugosa* ( $2n = 36$ ) showing almost undetectable DAPI<sup>+</sup> spots, and four bright terminal CMA<sup>+</sup> signals (A–B). Prometaphase of *R. corymbosa*. Note the large interstitial DAPI<sup>+</sup>/CMA<sup>+</sup> blocks in several chromosomes, and some smaller terminal DAPI<sup>0</sup>/CMA<sup>+</sup> ones (C–D). Prometaphase of *R. holoschoenoides* with no DAPI<sup>+</sup> signals and some terminal and interstitial CMA<sup>+</sup> blocks (E–F). Metaphasic chromosomes and interphasic nucleus of *R. terminalis* var. *rosemariana* showing four CMA<sup>+</sup>/DAPI<sup>-</sup> signals, terminally located on the chromosomes (G–H). Metaphase of *R. albobracteata*, with many terminal CMA<sup>+</sup> and fewer terminal DAPI<sup>+</sup> bands (I–J). Prometaphasic chromosomes of *R. globosa* with  $2n = 61$  with several interstitial CMA<sup>+</sup>/DAPI<sup>+</sup>, some interstitial and terminal CMA<sup>+</sup>, and some interstitial and terminal DAPI<sup>+</sup> bands (K–L).

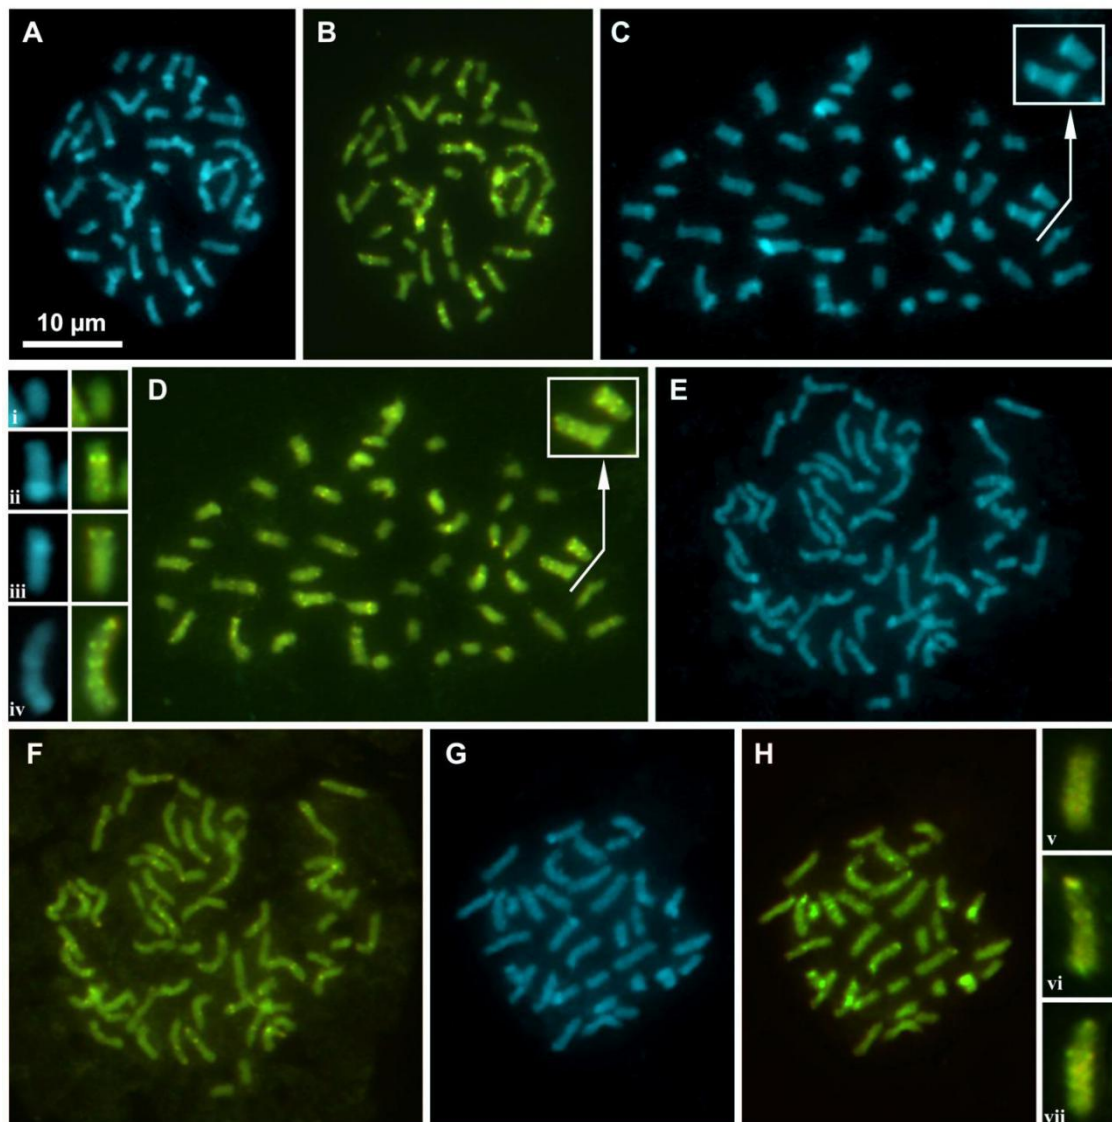

**Supplemental data 11.** C-CMA/DAPI banding in different populations of *Rhynchospora globosa*. Prometaphase with  $2n = 43$ , from Jaguariaíva (**A–B**). Chromosomes with different CMA/DAPI distribution are depicted (**i–iv**). Metaphase with  $2n = 49$ , from Tibagi (**C–D**), showing two chromosomes with colocalized terminal CMA/DAPI bands and interstitial CMA<sup>+</sup>/DAPI<sup>0</sup> bands (boxes). Prometaphase with  $2n = 61$ , from Carrancas (**E–F**). Prometaphase with  $2n = 36$ , from Chapadão do Céu (**G–H**). The individuals of this population have shown very faint DAPI<sup>+</sup> signals as opposed to many CMA<sup>+</sup> ones. Three chromosomes with different CMA<sup>+</sup> band distributions are represented in boxes (**v–vii**). Note that, in three out populations, a unique large chromosome with many CMA<sup>+</sup> bands stands out (**B, D, H, iv and vii**).

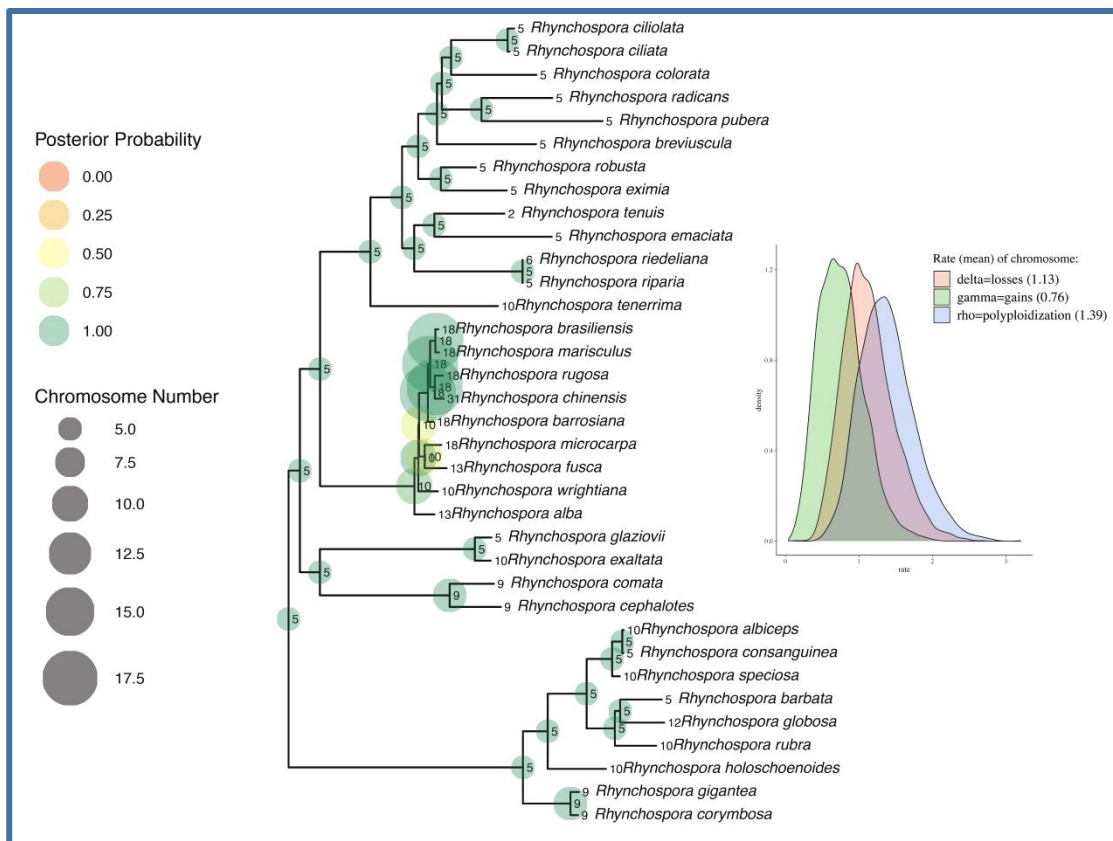

**Supplemental data 12.** RevBayes ChromEvol modelling of the ACN reconstruction along the Maximum Likelihood phylogenetic inference for *Rhynchospora* based on 54 chloroplast coding sequences (CDS) inferred with IQ-TREE, length: 51,383 bases. Density distributions show the estimated posterior values for the parameters rho, gamma and delta with their mean values in the legend.
